# Supplementary material for: Difference of stage at cancer diagnosis by socioeconomic status for four target cancers of the National Cancer Screening Program in Korea: Results from the Gwangju and Jeonnam cancer registries
Source: PubMed Central journal article supplement (PMC5498418; doi:10.1016/j.je.2016.07.004), 2017-03-06
Supplement: mmc1.pdf [file mmc1.pdf]

**eTable 1.** Proportion of later stage (regional/distant) at diagnosis according to socioeconomic status

|                                     | Stomach<br>(n=5,372) | Colorectal<br>(n=3,128) | Breast<br>(n=1,308) | Cervix<br>(n=705) |
|-------------------------------------|----------------------|-------------------------|---------------------|-------------------|
| <b>Rurality of residential area</b> |                      |                         |                     |                   |
| Metropolitan area                   | 935 (53.3)           | 899 (74.2)              | 302 (48.4)          | 134 (46.7)        |
| Urban                               | 706 (54.1)           | 526 (74.3)              | 194 (51.3)          | 94 (48.7)         |
| Rural                               | 345 (55.3)           | 247 (73.3)              | 48 (55.2)           | 28 (39.4)         |
| Remote rural                        | 968 (57.4)           | 634 (72.7)              | 124 (53.0)          | 86 (55.8)         |
| <b>Community Deprivation</b>        |                      |                         |                     |                   |
| Lowest                              | 684 (53.1)           | 623 (74.4)              | 123 (53.2)          | 96 (45.1)         |
| Mid-low                             | 756 (52.8)           | 472 (74.9)              | 210 (46.8)          | 81 (47.9)         |
| Mid-high                            | 752 (56.9)           | 630 (71.8)              | 128 (50.0)          | 71 (49.7)         |
| Highest                             | 761 (57.1)           | 581 (74.2)              | 192 (51.6)          | 94 (52.2)         |
| <b>Amount of monthly premium</b>    |                      |                         |                     |                   |
| Highest                             | 674 (52.8)           | 591 (72.6)              | 156 (47.9)          | 43 (46.7)         |
| Mid-high                            | 746 (54.1)           | 585 (73.5)              | 174 (49.4)          | 78 (47.3)         |
| Mid-low                             | 612 (54.3)           | 432 (71.4)              | 118 (47.8)          | 67 (48.6)         |
| Lowest                              | 922(58.0)            | 698 (76.5)              | 220 (55.3)          | 154 (49.7)        |

**eTable 2.** Sensitivity analysis of the association between the risk of later stage at diagnosis and amount of monthly premium

|                    | Odds ratios (95% confidence intervals) |                         |                     |                   |
|--------------------|----------------------------------------|-------------------------|---------------------|-------------------|
|                    | Stomach<br>(n=5,372)                   | Colorectal<br>(n=3,128) | Breast<br>(n=1,308) | Cervix<br>(n=705) |
| Amount of monthly  |                                        |                         |                     |                   |
| Highest            | 1 (reference)                          | 1 (reference)           | 1 (reference)       | 1 (reference)     |
| Mid-high           | 1.12 (0.96-1.30)                       | 1.11 (0.89-1.39)        | 1.04 (0.76-1.41)    | 1.08 (0.64-1.82)  |
| Mid-low            | 1.15 (0.97-1.35)                       | 1.05 (0.83-1.33)        | 1.01 (0.72-1.41)    | 1.18 (0.69-2.02)  |
| Lowest             | 1.28 (1.08-1.52)                       | 1.40 (1.09-1.80)        | 1.13 (0.82-1.57)    | 1.06 (0.64-1.76)  |
| Medical Aid        | 1.28 (1.05-1.57)                       | 1.09 (0.81-1.48)        | 2.00 (1.30-3.07)    | 1.39 (0.78-2.36)  |
| <i>P for trend</i> | 0.002                                  | 0.076                   | 0.013               | 0.399             |
